# Supplementary material for: An evidence-based digital prescription opioid safety toolkit for national dissemination: co-design and user testing
Source: Frontiers journal article supplement (doi:10.3389/fdgth.2025.1600836), 2025-07-11
Supplement: Data_Sheet_1.pdf [file Data_Sheet_1.pdf]

## *Supplementary Material*

### 1 Supplementary materials include:

1. Demographics of consumers in workshops and which workshops they attended
2. Demographics of professionals in workshops and which workshops they attended
3. Demographics of consumer participants in user testing interviews
4. Journey Mapping Activity Completed by Consumers in Workshop One
5. Example of Prototype v1
6. Example of Prototype v2

#### 1. Supplementary Table 1: Demographics of consumers in workshops.

| Participant | Gender | Duration of prescription opioid | Research Activity |            |            |
|-------------|--------|---------------------------------|-------------------|------------|------------|
|             |        |                                 | Workshop 1        | Workshop 2 | Workshop 3 |
| P01         | F      | Long term prescription          | X                 | X          |            |
| P02         | M      | Long term prescription          | X                 | X          | X          |
| P03         | F      | Long term prescription          | X                 |            | X          |
| P04         | F      | Long term prescription          | X                 | X          |            |
| P05         | F      | Long term prescription          | X                 |            |            |
| P06         | F      | Long term prescription          | X                 |            | X          |
| P07         | F      | Long term prescription          | X                 | X          |            |
| P08         | F      | Long term prescription          | X                 |            | X          |
| P09         | F      | Long term prescription          | X                 |            |            |
| P10         | F      | Long term prescription          | X                 | X          | X          |
| P11         | F      | Short term prescription, carer  |                   |            | X*         |
| P12         | M      | Short term prescription         |                   |            | X*         |
| P13         | F      | Short term prescription         |                   |            | X*         |

#### 2. Supplementary Table 2: Demographics of Healthcare Professionals and Stakeholders.

| Participant | Gender | Expertise                                             | Research Activity |            |            |
|-------------|--------|-------------------------------------------------------|-------------------|------------|------------|
|             |        |                                                       | Workshop 1        | Workshop 2 | Workshop 3 |
| E01         | F      | Academic Pharmacist (opioid deprescribing specialist) | X                 | X          |            |
| E02         | F      | Pharmacist in GP practice                             | X                 | X          | X          |
| E03         | F      | Stakeholder advocate                                  | X                 | X          |            |

|     |   |                                                        |   |   |   |
|-----|---|--------------------------------------------------------|---|---|---|
| E04 | F | Academic Pharmacist                                    | X | X | X |
| E05 | F | Pharmacist (Pain management specialist)                | X |   |   |
| E06 | F | Pharmacist in GP practice                              | X |   |   |
| E07 | M | Pharmacist (alcohol and other drug treatment focussed) | X |   |   |
| E08 | F | Community pharmacist                                   | X |   |   |
| E09 | F | Community pharmacist                                   | X | X | X |
| E10 | F | Community pharmacist                                   | X |   |   |
| E11 | F | Pharmacist (Community setting)                         | X | X |   |
| E12 | F | Prescriber/Pain Specialist                             | X | X | X |
| E13 | M | Stakeholder advocate                                   | X |   |   |

3. Supplementary Table 3: Demographics of consumer participants in user testing interviews.

| <b>Participant Number</b> | <b>Gender</b> | <b>Opioid Prescription Length</b> | <b>Operating System</b> | <b>Browser</b> | <b>Location (Metro/Regional, State)</b> |
|---------------------------|---------------|-----------------------------------|-------------------------|----------------|-----------------------------------------|
| P01                       | F             | More than 3 months                | Mac                     | Chrome         | Regional, NSW                           |
| P02                       | F             | Less than 2 weeks                 | PC                      | Edge           | Metro, VIC                              |
| P03                       | F             | 2 weeks to 3 months               | Mac                     | Safari         | Metro, VIC                              |
| P04                       | M             | More than 3 months                | Mac                     | Safari         | Metro, QLD                              |
| P05                       | F             | More than 3 months                | PC                      | Edge           | Metro, VIC                              |
| P06                       | F             | More than 3 months                | Mac                     | Firefox        | Metro, SA                               |
| P07                       | F             | More than 3 months                | Mac                     | Safari         | Metro, NSW                              |
| P08                       | M             | More than 3 months                | Android                 | Samsung        | Metro, SA                               |
| P09                       | F             | Less than 2 weeks                 | PC                      | Chrome         | Metro, VIC                              |
| P10                       | F             | More than 3 months                | Mac                     | Safari         | Regional, VIC                           |
| P11                       | M             | More than 3 months                | Mac                     | Chrome         | Regional, NSW                           |
| P12                       | M             | More than 3 months                | Mac                     | Safari         | ACT                                     |
| P13                       | F             | More than 3 months                | Mac                     | Chrome         | Regional, NSW                           |
| P14                       | F             | More than 3 months                | PC                      | Edge           | Regional, NSW                           |
| P15                       | M             | Less than 2 weeks                 | iPad                    | Safari         | Regional, NSW                           |

#### 4. Supplementary Figure 1: Journey Mapping Activity Completed by Consumers in Workshop One.

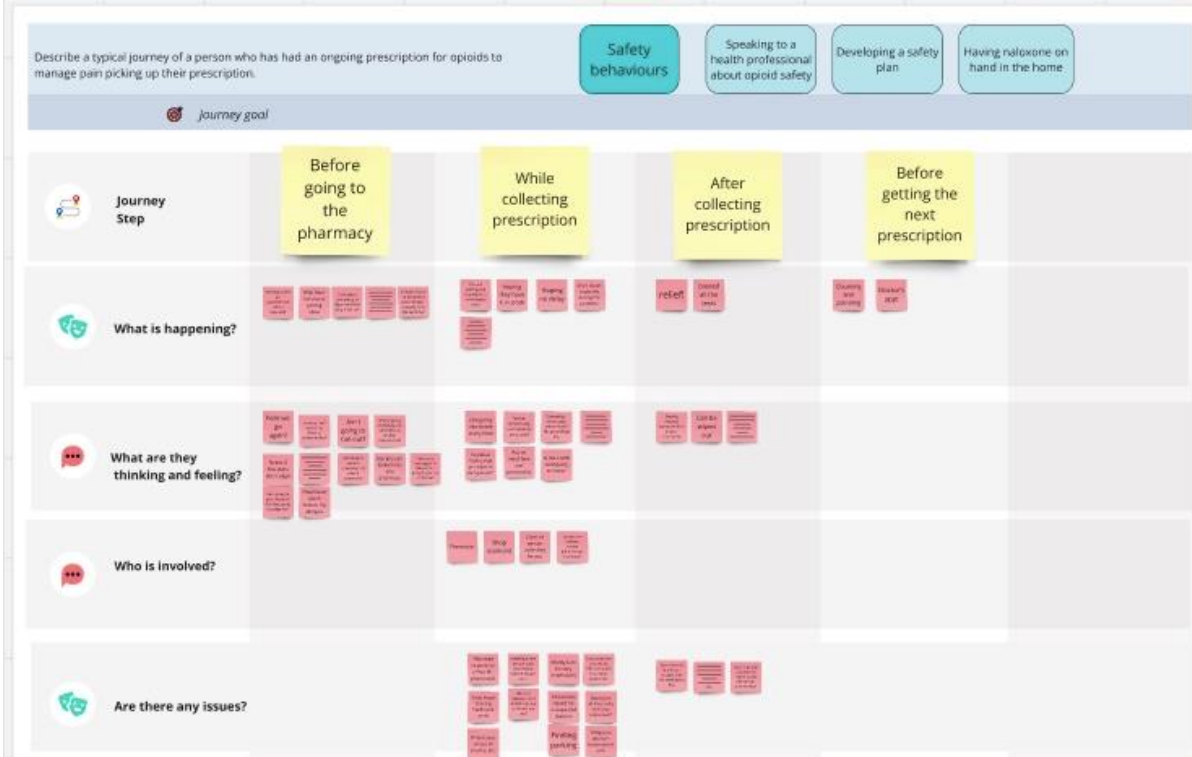

### 5. Supplementary Figure 2: Example of Prototype v1.

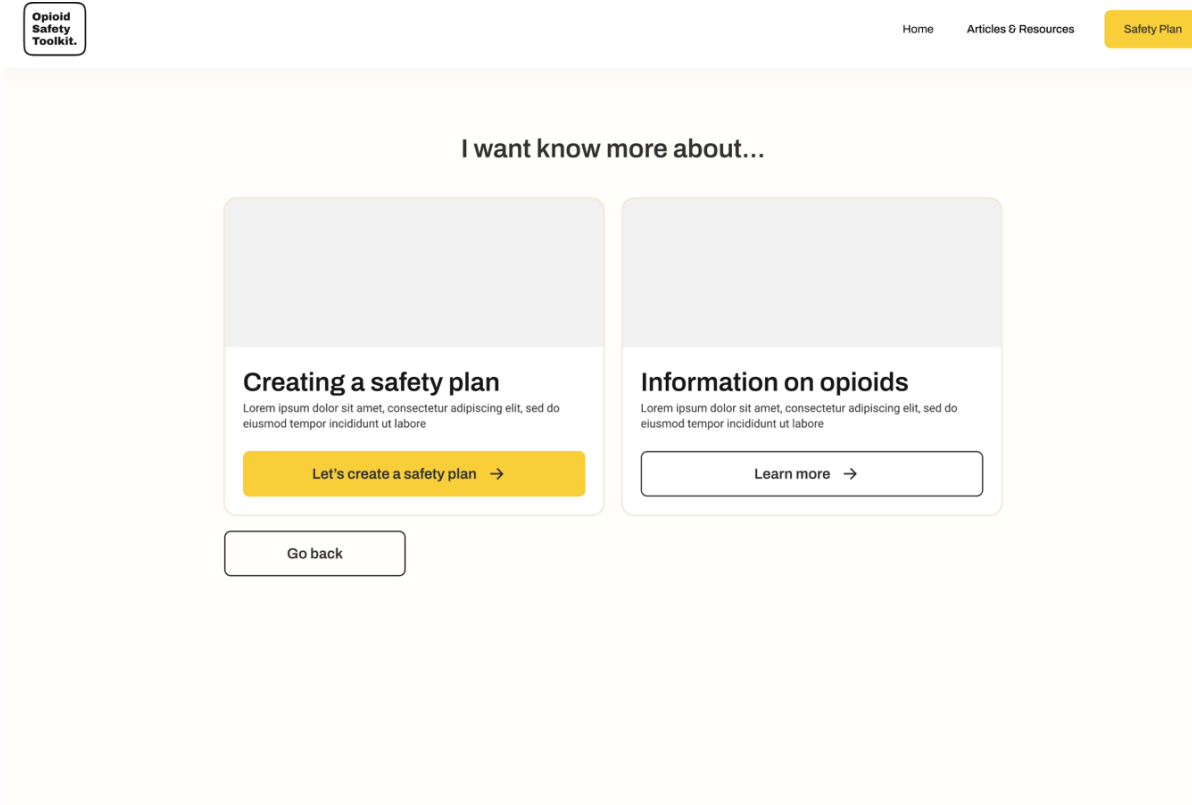

## 6. Supplementary Figure 3: Example of Prototype v2.

**Opioid Safety Toolkit.**

[Opioid safety plan](#) [ROOM Tool](#) [About naloxone](#) [About opioids](#) [About the toolkit](#) [Emergency guide](#)

Home > Safety plan

[← Go Back](#)

## About the opioid safety toolkit

This toolkit was designed with consumers and health professionals to help guide the safer use of prescription opioids. This toolkit includes guidance on developing a safety plan to help prevent or respond to severe opioid side effects, and using the ROOM (Routine Opioid Outcome Monitoring) tool to help monitor prescription opioid outcomes.

To get the best experience, please select one of the following options:

☒

I take prescription opioids

☐

I care for or know someone with prescribed opioids

☐

I am prescribed opioids for pain associated with cancer

[Go back](#) [Continue →](#)
